# Supplementary material for: Quantitative Analysis of Chiari-Like Malformation and Syringomyelia in the Griffon Bruxellois Dog
Source: PLoS One. 2014 Feb 12;9(2):e88120. doi: 10.1371/journal.pone.0088120 (PMC3922758; doi:10.1371/journal.pone.0088120)
Supplement: Table S2 — Sensitivity, Specificity, Positive Predictive Value (PPV) and Negative Predictive Value (NPV) based on F-diameter. The results indicate high levels of sensitivity, above 80%, are possible for both the diagnosis of CM and syringomyelia. These high sensitivity values (PPV) are however paired with much lower specificity values around 55% (NPV). The PPV results for CM diagnosis was consistently high for F-diameter values in the range but were accompanied by, in general, low NPV. For SM the PPV were in general lower and comparable to the NPV, both being mainly between 60–70%. (XLSX) [file pone.0088120.s002.xlsx]

## Sheet: Sheet1
F-diameter	Sensitivity	Specificity	PPV	NPV
cut off	%	%	%	%
CM Results
41.2	81.9	50	82.9	48.3
41.3	81.9	57.1	85	51.6
41.4	78.3	60.7	85.5	48.6
41.5	77.1	60.7	85.3	47.2
41.8	71.1	64.3	85.5	42.9
41.9	69.9	71.4	87.9	44.4
42	66.3	71.4	87.3	41.7
42.1	63.9	71.4	86.9	40
42.2	62.7	71.4	86.7	39.2
42.3	57.8	71.4	85.7	36.4
42.4	56.6	71.4	85.5	35.7
42.5	53	71.4	84.6	33.9
42.6	51.8	71.4	84.3	33.3
42.7	50.6	75	85.7	33.9
42.8	48.2	78.6	87	33.8
42.9	47	78.6	86.7	33.3
43	47	78.6	86.7	33.3
SM Results
41.3	82.1	39.7	57.3	69.2
41.4	82.1	45.6	59.8	72.1
41.5	80.6	47.1	60	71.1
41.6	79.1	47.1	59.6	69.6
41.7	79.1	48.5	60.2	70.2
41.8	77.6	52.9	61.9	70.6
41.9	76.1	54.4	62.2	69.8
42	73.1	55.9	62	67.9
42.1	70.1	55.9	61	65.5
42.2	70.1	58.8	62.7	66.7
42.3	65.7	60.3	62	64.1
42.4	64.2	64.7	64.2	64.7
42.5	61.2	66.2	64.1	63.4
42.6	59.7	70.6	66.7	64
42.7	56.7	70.6	65.5	62.3
42.8	53.7	70.6	64.3	60.8
